# Supplementary material for: A strategy to construct uniform MOFs/PAN nanowire derived bead-like Co3O4 for VOC catalytic combustion
Source: Royal Society of Chemistry journal article supplement (doi:10.1039/d0cc06139e), 2020-01-01
Supplement: d0cc06139e1.pdf [file d0cc06139e1.pdf]

## **Supporting Information**

# **A strategy to construct uniform MOFs/PAN nanowires derived bead-like Co<sub>3</sub>O<sub>4</sub> for VOCs catalytic combustion**

Weigao Han<sup>a,b</sup>, Fang Dong<sup>a</sup>, Weiliang Han<sup>a</sup>, Zhicheng Tang<sup>a\*</sup>

*(a. State Key Laboratory for Oxo Synthesis and Selective Oxidation, National  
Engineering Research Center for Fine Petrochemical Intermediates, Lanzhou*

*Institute of Chemical Physics, Chinese Academy of Sciences, Lanzhou 730000, PR*

*China*

*b. University of Chinese Academy of Sciences, Beijing 100049, PR China)*

## **Experimental section**

**Chemical and materials.** PAN (average Mw 150,000) and 2-methylimidazole (cas 693-98-1) were purchased from Aladdin.

**Preparation of H-PAN and NH-PAN** 1.8 g of PAN was dissolved into 20 ml DMF. Then nanowires were prepared by the technique of electro-spinning. The feed rate was 1.0 mL·h<sup>-1</sup>. The voltage was 20 V. 0.2 g of the obtained nanowires was put into dilute nitric acid solution. The nanowires need to be teared into thin layers. And it's important to have a good dispersion. The dilute nitric acid solution was made by adding 18 ml into 20 ml nitric acid ( $\omega=65-68\%$ ). The temperature was rised up to 80 °C and kept for 11h. Then the H-PAN was obtained. The obtain H-PAN was flexible not rigidity. The obtained H-PAN was washed with water and was impregnated into 50 ml ammonia for 12h. Then the NH-PAN was obtained. The obtained NH-PAN was washed several times with water.

**Preparation of PAN-ZIF, ZIF/H-PAN and ZIF/NH-PAN** 2.86 g of Co(NO<sub>3</sub>)<sub>2</sub>·6H<sub>2</sub>O was dissolved into 100 ml anhydrous methanol. Then the untreated PAN was kept into the solution for 12h. 6.86 g of 2-methylimidazole was dissolved into 100 ml anhydrous methanol. Then the former solution was poured into the latter solution. Then the mixed solution was kept for 24h at 25 °C. The obtained PAN-ZIF was washed with water under a high stirring speed and dried at room temperature. The ZIF/H-PAN and ZIF/NH-PAN was prepared by the same way except that the untreated PAN was replaced by the H-PAN and NH-PAN.

**Preparation of H-Co<sub>3</sub>O<sub>4</sub> and NH-Co<sub>3</sub>O<sub>4</sub>** The H-Co<sub>3</sub>O<sub>4</sub> and NH-Co<sub>3</sub>O<sub>4</sub> were prepared

by thermal treatment of H-PAN and NH-PAN, respectively. The samples were heated at 400 °C for 1h with a heating rate of 5 °C min<sup>-1</sup> in air.

**Preparation of Co<sub>3</sub>O<sub>4</sub>** The Co<sub>3</sub>O<sub>4</sub> were prepared by thermal treatment of Co(NO<sub>3</sub>)<sub>2</sub>·6H<sub>2</sub>O. The samples were heated at 400 °C for 1h with a heating rate of 5 °C min<sup>-1</sup> in air.

### **Characterization of materials**

The morphology of the samples was evaluated with transmission electron microscope (TEM). The images of TEM and selected-area electron diffraction patterns were obtained under a microscope of 200 kV using FEI TECNAIG<sup>®</sup>. Power X-ray diffraction (XRD) analysis was finished at 60 kV and 55 mA with a scanning speed of 0.5° min<sup>-1</sup>. The 2θ of wide-angle ranged from 10° to 80°. Raman scattering was done by using a Laboratory Human Resources Evolution Raman spectrometer (BX41). The XPS measurement was done on a VG ESCALAB 210 Electron Spectrometer (Mg Kα radiation; hv = 1253.6 eV). The specific surface area and the average pore diameter of the catalysts were measured by nitrogen adsorption with a micromeritics ASAP2010 instrument.

For H<sub>2</sub>-TPR, a 40 mg sample was pre-treated at an atmosphere of nitrogen. The temperature was increased from room temperature to 350 °C with a heating rate of 10 °C min<sup>-1</sup>. When it cooled down to room temperature, the temperature was increased from room temperature to 900 °C with a heating rate of 10 °C min<sup>-1</sup>. A reducing gas of 5 % vol. H<sub>2</sub> and 95 % vol. N<sub>2</sub> was passed on the sample at the same time.

For O<sub>2</sub>-TPD, an 80 mg sample was pre-treated at an atmosphere of nitrogen. The

temperature was increased from room temperature to 350 °C with a heating rate of 10 °C min<sup>-1</sup>. And it was treated for 90 min. When it cooled down to room temperature, the temperature was increased from room temperature to 30 °C for 60 min with a gas of 5 % vol. O<sub>2</sub> and 95 % vol. N<sub>2</sub> passing through. Finally, the temperature was increased from room temperature to 900 °C with a heating rate of 10 °C min<sup>-1</sup>.

For NH<sub>3</sub>-TPD, an 80 mg sample was pre-treated at an atmosphere of nitrogen. The temperature was increased from room temperature to 350 °C with a heating rate of 10 °C min<sup>-1</sup>. And it was treated for 90 min. When it cooled down to room temperature, the temperature was increased from room temperature to 50 °C for 60 min with a gas of 5 % vol. NH<sub>3</sub> and 95 % vol. N<sub>2</sub> passing through. Finally, the temperature was increased from room temperature to 900 °C with a heating rate of 10 °C min<sup>-1</sup>.

### **Catalytic activity measurements**

The catalytic oxidation of toluene was evaluated by using a fixed-bed flow reactor operating at steady-state flow mode. Then, 0.4 g catalysts (40-60 mesh) and 0.7 g quartz sand (40-60 mesh) were mixed uniformly. They were put onto the reactor. The reaction gas containing VOCs (3000 ppm) was generated by bubbling air through a VOC saturator, and then passed through the reactor with a weight hourly space velocity (WHSV) of 30000 mL g<sup>-1</sup> h<sup>-1</sup>. The first temperature was 100 °C. The activity was measured per 20 °C. Before each test, it needed to stabilize for 2 h. Reactants and products were analyzed with an online GC-6820 gas chromatograph with a flame ionization detector, Conversion was defined as:

$$C_{toluene} = \frac{[C]_{inlet} - [C]_{outlet}}{[C]_{inlet}} \times 100\%$$

### The calcination of activation energy

It was reasonable to assume that the oxidation of toluene in the presence of excessive oxygen would follow first-order reaction mechanism. It's respected to toluene concentration:

$$r = -kc = \left( -A \exp\left(\frac{-Ea}{RT}\right) \right) c$$

Where r, k, A, c and Ea stand for the reaction rate (mol s<sup>-1</sup>), rate constant (s<sup>-1</sup>), pre-exponential factor, concentration of toluene in feed stream (mol m<sup>-3</sup>) and apparent activation energy (kJ mol<sup>-1</sup>), respectively.

$$r = \frac{F}{W} (-\ln(1-x))$$

Where F stands for toluene feeding rate (1.08×10<sup>-7</sup> mol s<sup>-1</sup>), W stands for the weight of the catalyst (0.4 g), x stands for the toluene conversion. So the equation can be rewritten to:

$$\ln r = \frac{-Ea}{RT} + B$$

At here, B is a constant. Therefore, the activation energy could be evaluated from the slope of linear ln r versus 1000/T.

### The calcination of TOF

$$TOF = \frac{(Pv/RT)\eta}{m_{cat}\omega_{Co}/M_{Co}}$$

Where P = 0.101 MPa, v is the flow rate of toluene (ml min<sup>-1</sup>), R = 8.314 J mol<sup>-1</sup> K<sup>-1</sup>, η is the toluene conversion (%), m<sub>cat</sub> is the mass of catalyst (0.4 g), ω<sub>Co</sub> is the Co

loading calculated according to the XPS data (%) and  $M_{Co}$  is the molar mass (58.93 g mol<sup>-1</sup>).

**Table S1** Data of characterization of the H-Co<sub>3</sub>O<sub>4</sub> and NH-Co<sub>3</sub>O<sub>4</sub> samples.

| Samples                           | S <sub>BET</sub><br>(m <sup>2</sup> /g) <sup>a</sup> | Pore<br>volume/<br>m <sup>3</sup> g <sup>-1</sup> | Co <sup>3+</sup> /Co <sup>2+</sup> | O <sub>β</sub> /(O <sub>α</sub> +O <sub>β</sub><br>+O <sub>γ</sub> ) |
|-----------------------------------|------------------------------------------------------|---------------------------------------------------|------------------------------------|----------------------------------------------------------------------|
| H-Co <sub>3</sub> O <sub>4</sub>  | 39.86                                                | 0.17                                              | 0.56                               | 0.42                                                                 |
| NH-Co <sub>3</sub> O <sub>4</sub> | 31.62                                                | 0.15                                              | 1.58                               | 0.26                                                                 |

**Table S2** Surface area of the H-Co<sub>3</sub>O<sub>4</sub> and NH-Co<sub>3</sub>O<sub>4</sub> fitted O<sub>2</sub>-TPD samples.

| Samples                           | $\alpha$ | $\alpha'$ | $\beta$ |
|-----------------------------------|----------|-----------|---------|
| H-Co <sub>3</sub> O <sub>4</sub>  | 425.25   | 430.01    | 594.16  |
| NH-Co <sub>3</sub> O <sub>4</sub> | 210.12   | 368.97    | 251.69  |



**Table S3 Comparison of different catalysts on the activity of toluene oxidation.**

| Samples                                  | VOC type | VOC conc.<br>(ppm) | WHSV<br>(mL g <sup>-1</sup> h <sup>-1</sup> ) | T <sub>90</sub> /°C | Ref. no.  |
|------------------------------------------|----------|--------------------|-----------------------------------------------|---------------------|-----------|
| Hollow Co <sub>3</sub> O <sub>4</sub>    | Toluene  | 3000               | 30000                                         | 246                 | 1         |
| Pd/InOx@CoO <sub>x</sub>                 | Toluene  | 3000               | 30000                                         | 253                 | 2         |
| Co-CO <sub>3</sub>                       | Toluene  | 1000               | 40000                                         | 250                 | 3         |
| 6.5Au/Fe <sub>2</sub> O <sub>3</sub>     | Toluene  | 1000               | 20000                                         | 260                 | 4         |
| Mn-Co (1:1)                              | Toluene  | 1000               | 30000                                         | 249                 | 5         |
| Bead-like Co <sub>3</sub> O <sub>4</sub> | Toluene  | 1000               | 30000                                         | 210                 | This work |

In Table S3, we compared the catalytic performance of our samples with the previous reports. Zhao et al. [1] prepared the hollow Co<sub>3</sub>O<sub>4</sub> catalyst derived from ZIF-67, T<sub>90</sub> of which was 246 °C. Compared with this, the bead-like Co<sub>3</sub>O<sub>4</sub> catalyst showed a better catalytic performance. It might illustrate that the tube-like structure's advantage. Du et al. [2] prepared the tube-like Pd/InOx@CoO<sub>x</sub> catalyst derived from Pd/In@ZIF-67, T<sub>90</sub> of which was 253 °C. It might turn out that the way that we prepared the catalyst was better than the traditional way. Zhang et al. [3] prepared the nanocrystalline Co<sub>3</sub>O<sub>4</sub> catalyst via various precipitants. And different Co<sub>3</sub>O<sub>4</sub> catalysts derived from different precipitants had big differences in activity. Compared with the traditional ways, our catalyst also had a good catalytic performance. Han et al. [4] prepared nanodisk-like 6.5Au/Fe<sub>2</sub>O<sub>3</sub> catalyst, T<sub>90</sub> of which was 260 °C. Qu et al. [5] prepared bimetal Co/Mn catalyst, T<sub>90</sub> of which was 249 °C. Compared with bimetal catalyst and other metal catalyst, the bead-like catalyst showed a better catalytic performance.

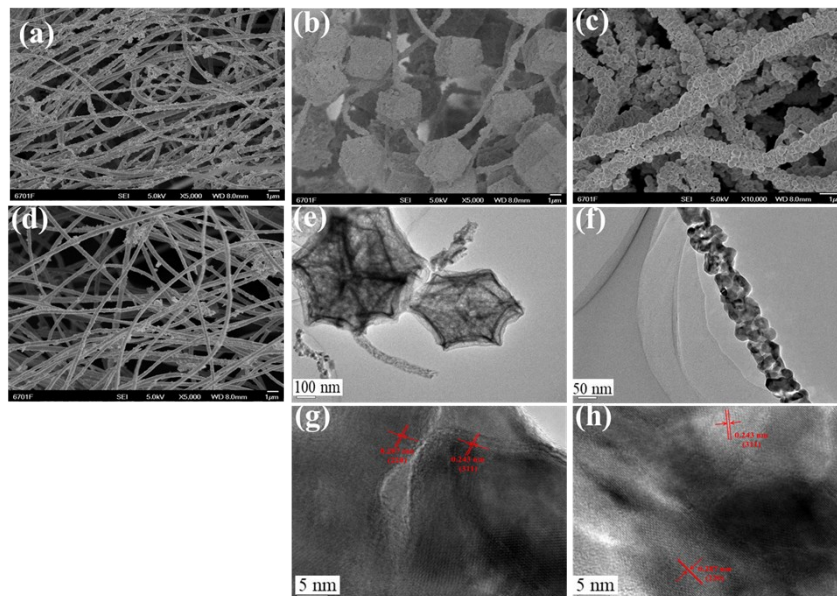

**Fig. S1** SEM images of the PAN-ZIF (a) (d), ZIF/H-PAN (b) and ZIF/NH-PAN (c) samples, TEM images of the H-Co<sub>3</sub>O<sub>4</sub> (e) and NH-Co<sub>3</sub>O<sub>4</sub> (f) samples, HRTEM images of the H-Co<sub>3</sub>O<sub>4</sub> (g) and NH-Co<sub>3</sub>O<sub>4</sub> (h) samples.

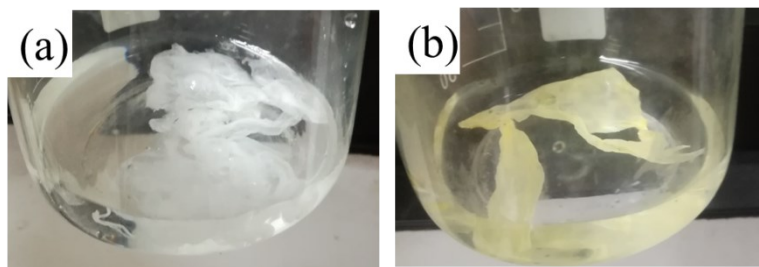

**Fig. S2** The image of H-PAN (a), NH-PAN (b).

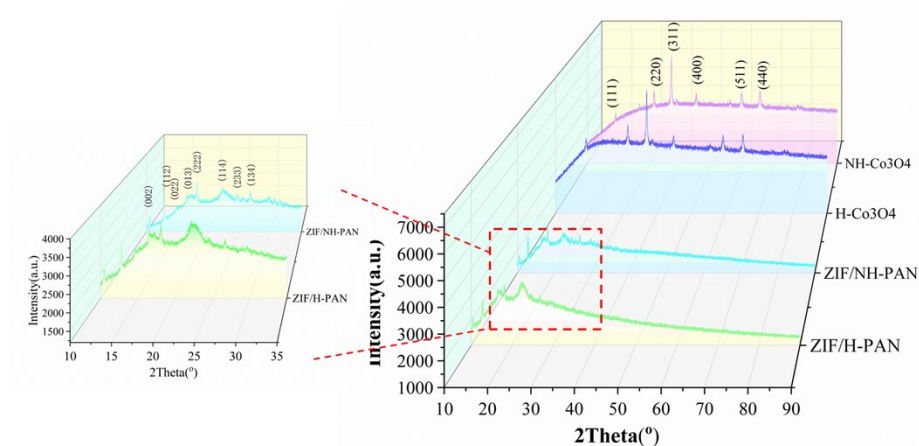

**Fig. S3** XRD patterns of the ZIF/H-PAN, ZIF/NH-PAN, H-Co<sub>3</sub>O<sub>4</sub> and NH-Co<sub>3</sub>O<sub>4</sub> samples.

Fig. S3 showed the XRD patterns of ZIF/H-PAN, ZIF/NH-PAN, H-Co<sub>3</sub>O<sub>4</sub> and NH-Co<sub>3</sub>O<sub>4</sub>. Both of the ZIF/H-PAN and ZIF/NH-PAN showed the same crystal plane of ZIF-67, which was accordance with what reported in other literatures [6]. Peaks at 2θ values of 10.40° (002), 12.73° (112), 14.69° (022), 16.45° (013), 18.03° (222), 22.12° (114), 24.49° (233) and 26.65° (134) were assigned to crystalline ZIF-67. From the XRD result, we could also confirm that ZIF-67 was successfully loaded on the substrate. Peaks of H-Co<sub>3</sub>O<sub>4</sub> and NH-Co<sub>3</sub>O<sub>4</sub> at 2θ values of 19.00° (111), 31.27° (220), 36.85° (311), 44.80° (400), 59.36° (511) and 65.24° (440) were assigned to crystalline Co<sub>3</sub>O<sub>4</sub>. Based on the analysis of the half width of the representative diffraction peak for (311), we calculated the crystals' size of both H-Co<sub>3</sub>O<sub>4</sub> and NH-Co<sub>3</sub>O<sub>4</sub> samples. The crystals' size of H-Co<sub>3</sub>O<sub>4</sub> was 24.8 nm and NH-Co<sub>3</sub>O<sub>4</sub> was 23.1 nm. The crystals' size of both two samples was almost the same.

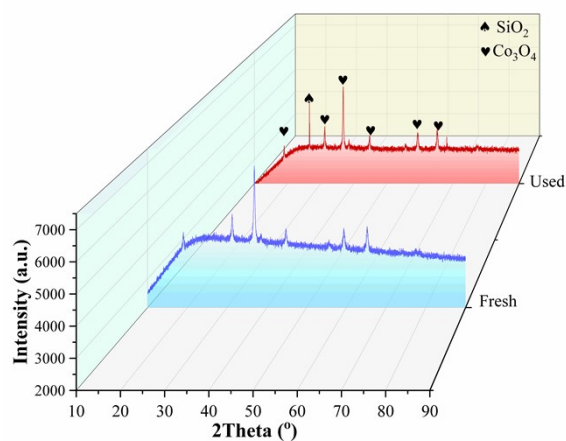

**Fig. S4** XRD patterns of the fresh and used H-Co<sub>3</sub>O<sub>4</sub> samples.

Fig. S4 showed XRD patterns of the fresh and used H-Co<sub>3</sub>O<sub>4</sub> samples. As shown in Fig. S4, both the fresh and used samples showed the same lattice planes of Co<sub>3</sub>O<sub>4</sub>. It might turn out that the H-Co<sub>3</sub>O<sub>4</sub> samples didn't have an obvious change in phase composition, which might illustrate that the catalyst had a good stability. Peaks at 26.24° could be assigned to the (011) lattice planes of SiO<sub>2</sub> (PDF-#47-1144). It might be caused by quartz sand, which was mixed with catalyst before they were put into reactor.

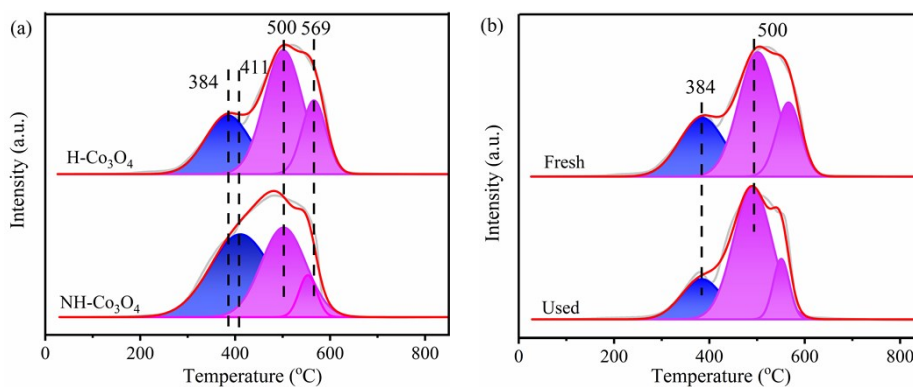

**Fig. S5** H<sub>2</sub>-TPR curves of the H-Co<sub>3</sub>O<sub>4</sub> and NH-Co<sub>3</sub>O<sub>4</sub> samples (a), the fresh and used H-Co<sub>3</sub>O<sub>4</sub> samples (b).

H<sub>2</sub>-TPR was tested to explore the reducibility of the samples. As shown in Fig. S5, both catalysts showed two main peaks. The early peaks at around 400 °C were assigned to the reduction of Co<sup>3+</sup> to Co<sup>2+</sup>. Peaks at around 500 °C were assigned to the reduction of Co<sup>2+</sup> to Co<sup>0</sup> [7]. To prove the stability of the catalyst, the materials after reaction were tested. As shown in Fig. S5, both fresh and used samples showed similar peak position and intensity. It might turn out that the used samples could still keep a good reducibility after a 24 hours' thermal stability test.

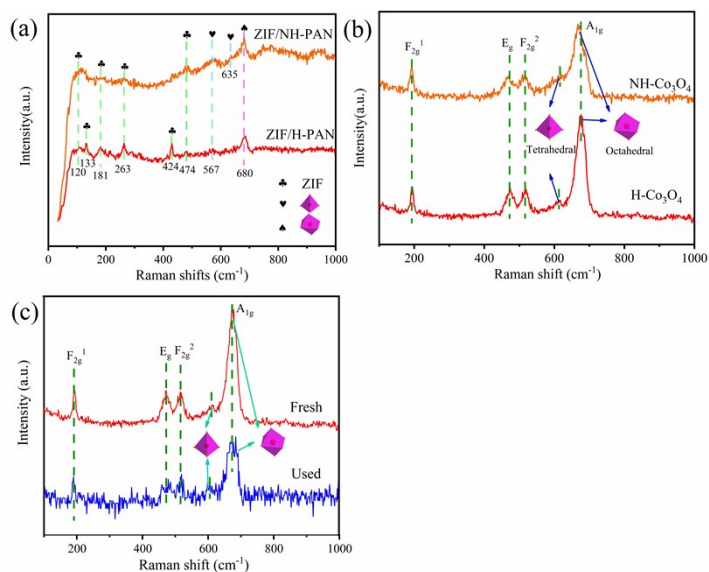

**Fig. S6** Raman spectra of the H-PAN, NH-PAN (a), H-Co<sub>3</sub>O<sub>4</sub>, NH-Co<sub>3</sub>O<sub>4</sub> (b) and the fresh and used H-Co<sub>3</sub>O<sub>4</sub> (c) samples.

Peak around 120 cm<sup>-1</sup> could be regarded as vibration of ZIFs' Co ions. Peak at 133 cm<sup>-1</sup>, 181 cm<sup>-1</sup>, 263 cm<sup>-1</sup>, 424 cm<sup>-1</sup> and 474 cm<sup>-1</sup> were attributed to ZIFs. As shown in Fig. S6c, There was no blue and red shift of Co-O band. It turned out that the chemical environment of Co didn't have an obvious change after the reaction, which might illustrate that catalyst had a good stability.

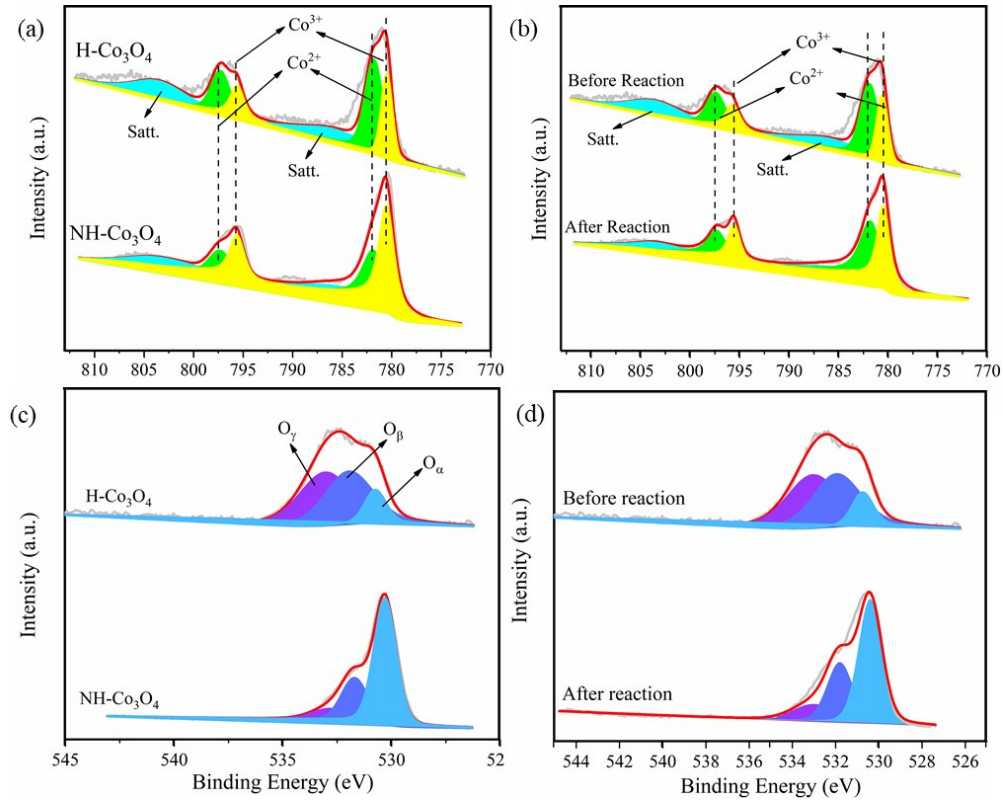

**Fig. S7** XPS spectra of the H-Co<sub>3</sub>O<sub>4</sub> and NH-Co<sub>3</sub>O<sub>4</sub> Co 2p (a) samples, the H-Co<sub>3</sub>O<sub>4</sub> samples before and after reaction Co 2p samples (b), the H-Co<sub>3</sub>O<sub>4</sub> and NH-Co<sub>3</sub>O<sub>4</sub> O 1s samples (c), the H-Co<sub>3</sub>O<sub>4</sub> samples before and after reaction O 1s samples (d).

The peaks of Co 2p were divided into four parts (two main peaks: Co<sup>3+</sup> and Co<sup>2+</sup>, and two satellite peaks: Sa1 and Sa2) based on this report [8, 9]. The peaks of O 1s were also divided into lattice oxygen (O<sub>α</sub>), surface absorbed oxygen (O<sub>β</sub>) and molecular water or hydroxyl groups (O<sub>γ</sub>) [10, 11].



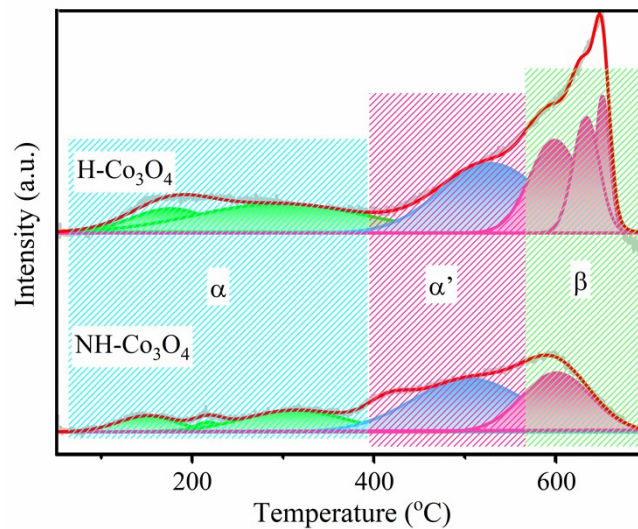

**Fig. S8** O<sub>2</sub>-TPD curves of the H-Co<sub>3</sub>O<sub>4</sub> and NH-Co<sub>3</sub>O<sub>4</sub> samples.

O<sub>2</sub>-TPD was tested to study the type of oxygen species fatherly. Peaks below 400 °C were considered to weakly chemisorbed oxygen species ( $\alpha$ ), which was mainly absorbed at surface oxygen vacancies [12, 13]. Peaks between 400 and 600 °C were considered to surface lattice oxygen speices ( $\alpha'$ ), which was mainly absorbed at lattice defects. Peaks above 600 °C were considered to lattice oxygen ( $\beta$ ).

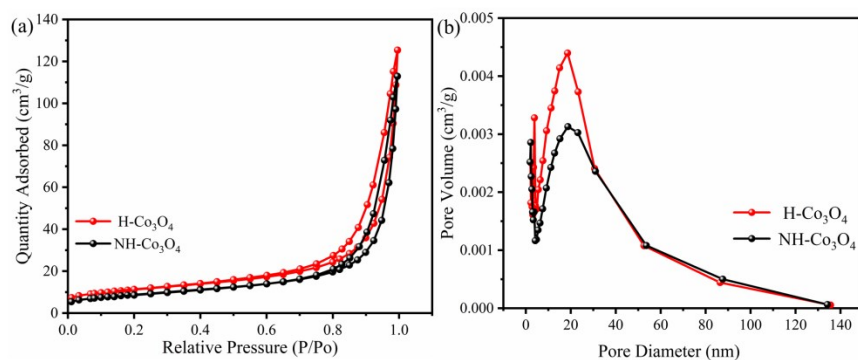

**Fig. S9** Adsorption-desorption curves (a) and pore-size distributions (b) of the H-Co<sub>3</sub>O<sub>4</sub> and NH-Co<sub>3</sub>O<sub>4</sub> samples

Fig. S9a exhibited that both samples exhibited the type IV H3 at a relatively high pressure. The specific surface areas, pore volumes, pore sizes of the samples were summarized in the Table S1. The specific surface areas of H-Co<sub>3</sub>O<sub>4</sub> and NH-Co<sub>3</sub>O<sub>4</sub> were 39.86 and 31.62 m<sup>2</sup> g<sup>-1</sup>, respectively. The pore volumes of H-Co<sub>3</sub>O<sub>4</sub> and NH-Co<sub>3</sub>O<sub>4</sub> were 0.17 and 0.15 cm<sup>3</sup> g<sup>-1</sup>, respectively.

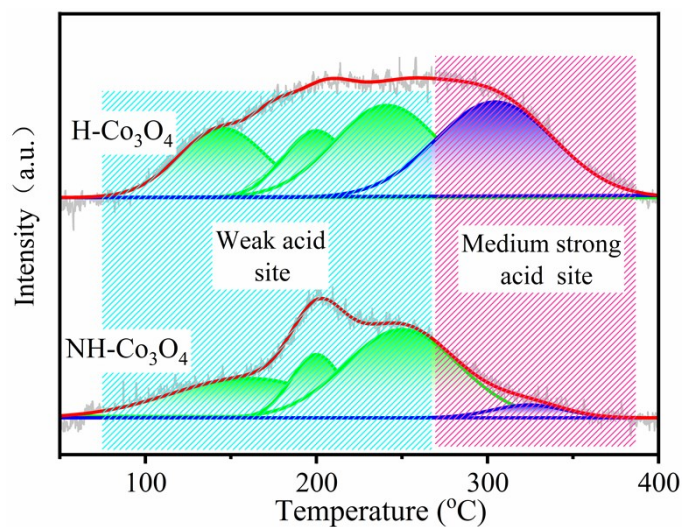

**Fig. S10** NH<sub>3</sub>-TPD curves of the H-Co<sub>3</sub>O<sub>4</sub> and NH-Co<sub>3</sub>O<sub>4</sub> samples.

NH<sub>3</sub>-TPD was tested to study surface acidity of catalyst. Peaks between 100 and 300 °C could be regarded as weak acid sites and peaks between 300 and 400 °C could be regarded as medium strong acid sites [14].

## References

1. J. Zhao, Z. Tang, F. Dong, J. Zhang, *Mol. Catal.*, 463 (2019) 77-86.
2. X. Du, F. Dong, Z. Tang, J. Zhang, *Nanoscale*, 12 (2020) 12133-12145.
3. W. Zhang, J. Díez-Ramírezb, P. Anguitaa, C. DescorMEA, J. Luis Valverdeb, A. Giroir-Fendlera, *Appl. Catal. B: Environ.*, 273 (2020) 118894-118908.
4. W. Han, J. Deng, S. Xie, H. Yang, H. Dai, C. Au, *Ind. Eng. Chem. Res.*, 53 (2014) 3486-3494.
5. Z. Qu, K. Gao, Q. Fu, Y. Qin, *Catal. Commun.*, 52 (2014) 31-35.
6. N. Mahmoodia, M. Taghizadeha, A. Taghizadeha, J. Abdia, B. Hayatib, A. Shekarchi, *Appl. Surf. Sci.*, 480 (2019) 288-299.
7. J. Zhong, Y. Zeng, M. Zhang, W. Feng, D. Xiao, J. Wu, P. Chen, M. Fu, D. Ye, *Chem. Eng. J.*, 397 (2020) 125375-125387.
8. Y. Cao, T. Zi, C. Liu, D. Cui, D. Wu, A. Li, *Chem. Comm.*, 56 (2020) 8675-8678.
9. F. Dong, W. Han, H. Zhao, G. Zhang, Z. Tang, *Nanoscale*, 11 (2019) 9937-9948.
10. T. Cai, H. Huang, W. Deng, Q. Dai, W. Liu, X. Wang, *Appl. Catal. B: Environ.*, 166-167 (2015) 393-405.
11. J. Zang, S. Wang, F. Wang, Z. Long, F. Mo, Y. Xia, F. Fang, Y. Song, D. Sun, *J. Mater. Chem. A*, 8 (2020) 14935-14943.
12. X. Weng, W. Wang, Q. Meng, Z. Wu, *Catal. Sci. Technol.*, 8 (2018) 4364-4372.
13. J. Zhang, X. Weng, Z. Wu, Y. Liu, H. Wang, *Appl. Catal. B: Environ.*, 126 (2012) 231-238.
14. L. Zong, G. Zhang, J. Zhao, F. Dong, J. Zhang, Z. Tang, *Chem. Eng. J.*, 343 (2018)

500-511.
